# Supplementary material for: Manipulating resistive states in oxide based resistive memories through defective layers design
Source: Royal Society of Chemistry journal article supplement (doi:10.1039/c7ra11681k), 2017-01-01
Supplement: c7ra11681k1.pdf [file c7ra11681k1.pdf]

## Manipulating Resistive States in Oxides based Resistive Memories through Defective Layers Design

Zhemi Xu, Peiyuan Guan, Adnan Younis, Dewei Chu\* and Sean Li

School of Materials Science and Engineering, University of New South Wales, Sydney, NSW 2052, Australia

### Supporting materials

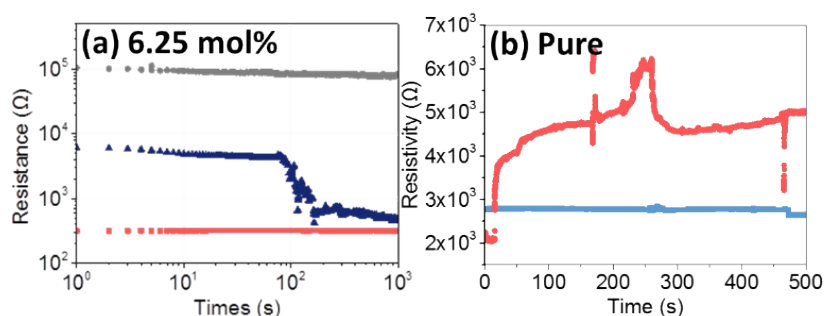

Figure S-1 Retention tests of single layer (a) Mn-doped and (b) pure SnO<sub>2</sub>

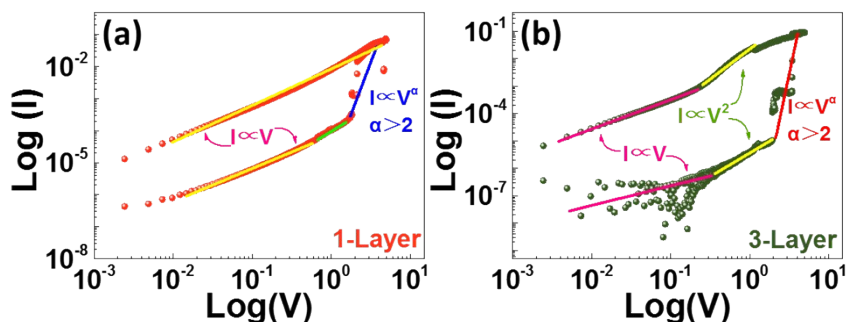

Figure S-2 Voltage-Current curves in log-log scale of (a) 1-Layer and (b) 3-Layer

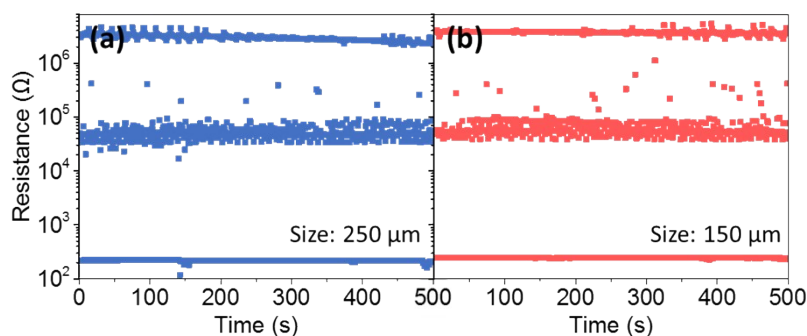

Figure S-3 Cell size dependent retention tests

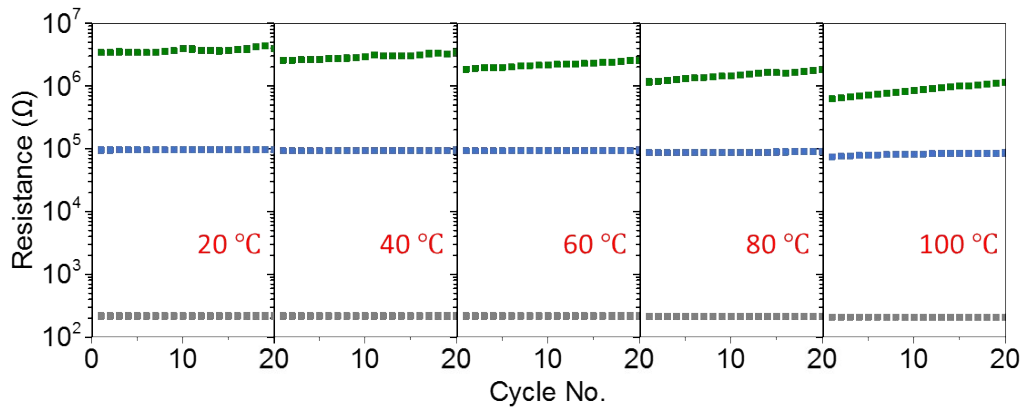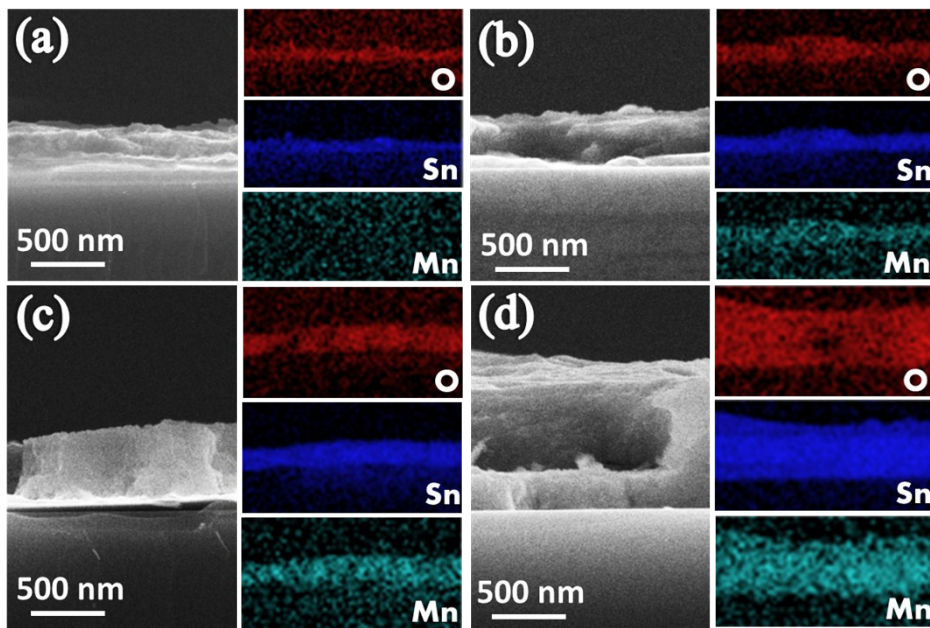

Figure S-4 Temperature dependence of resistance level

Figure S-5 SEM images and EDS images of thin film cross-sections: (a) Pure-Layer; (b) 1-Layer; (c) 3-Layer and (d) 4-Layer
